# Supplementary material for: Exploring Titanium(IV) Complexes as Potential Antimicrobial Compounds
Source: MDPI journal article supplement (doi:10.3390/antibiotics11020158), 2022-01-26
Supplement: s1 [file s1]

## Exploring Titanium(IV) Complexes as Potential Antimicrobial Compounds

### Supporting Information

Israel Rodríguez, Lauren Fernández-Vega, Andrea N. Maser-Figueroa, Branlee Sang, Patricia González-Pagán, and Arthur D. Tinoco

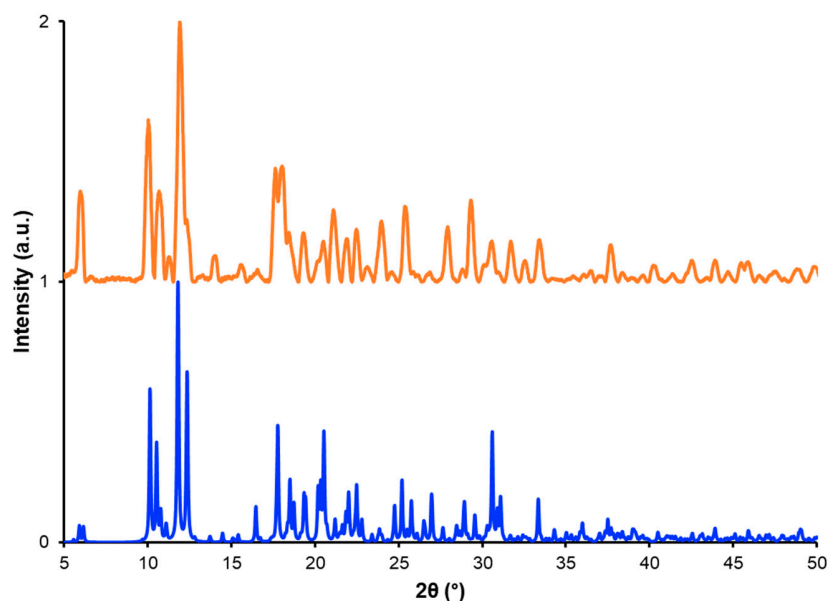

**Figure S1.** Powder X-ray diffractogram overlay of the simulated  $\text{Ti}(\text{salicylate})_3$  obtained from the Cambridge Structural Database deposition number 282262 (bottom, blue) and synthesized  $\text{Ti}(\text{salicylate})_3$  (top, orange).

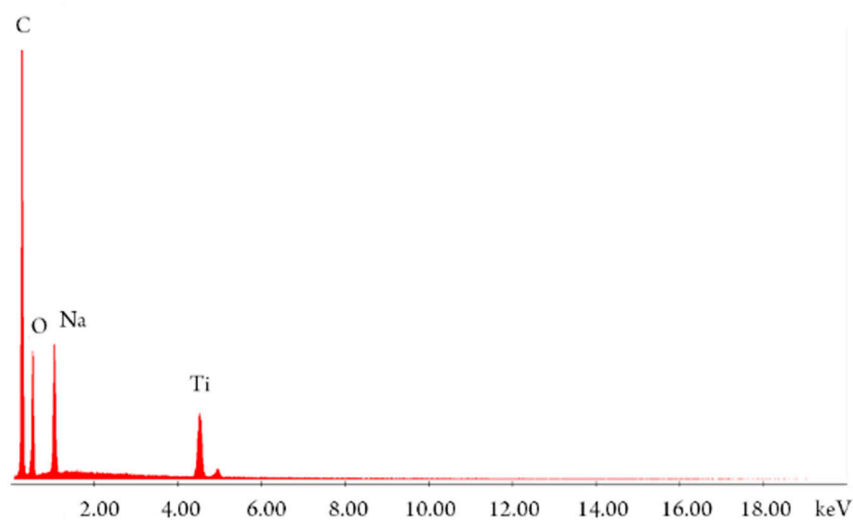

**Figure S2.** Energy dispersive spectra of  $\text{Ti}(\text{salicylate})_3$  complex displaying the presence of atoms (carbon and oxygen) present in the ligand and the metal (titanium).

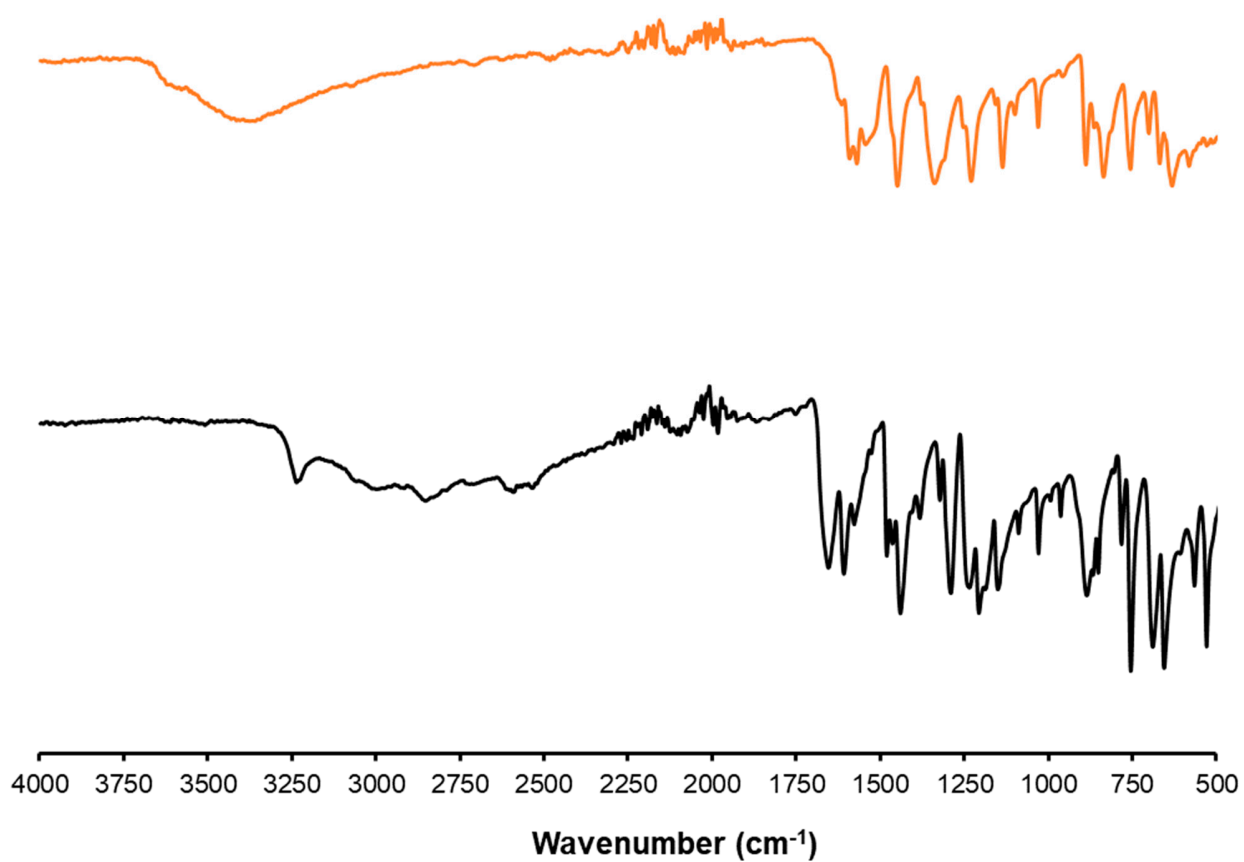

**Figure S3.** FTIR spectrum of salicylic acid (bottom, black) and Ti(salicylate)<sub>3</sub> (top, orange).

**Table S1.** Concentrations of the compounds tested by the CO-ADD converted from  $\mu\text{g/mL}$  to micromolar.

| $\mu\text{g/mL}$ | 32                              | 16    | 8    | 4    | 2    | 1   | 0.5 | 0.25 |
|------------------|---------------------------------|-------|------|------|------|-----|-----|------|
| <b>Compound</b>  | Concentration ( $\mu\text{M}$ ) |       |      |      |      |     |     |      |
| 1                | 108.8                           | 54.4  | 27.2 | 13.6 | 6.8  | 3.4 | 1.7 | 0.9  |
| 2                | 199.8                           | 99.9  | 49.9 | 25.0 | 12.5 | 6.2 | 3.1 | 1.6  |
| 3                | 126.4                           | 63.2  | 31.6 | 15.8 | 7.9  | 3.9 | 2.0 | 1.0  |
| 4                | 85.7                            | 42.9  | 21.4 | 10.7 | 5.4  | 2.7 | 1.3 | 0.7  |
| 5                | 72.3                            | 36.1  | 18.1 | 9.0  | 4.5  | 2.3 | 1.1 | 0.6  |
| 6                | 231.7                           | 115.8 | 57.9 | 29.0 | 14.5 | 7.2 | 3.6 | 1.8  |
| 7                | 43.7                            | 21.8  | 10.9 | 5.5  | 2.7  | 1.4 | 0.7 | 0.3  |
| 8                | 48.9                            | 24.4  | 12.2 | 6.1  | 3.1  | 1.5 | 0.8 | 0.4  |
| 9                | 49.7                            | 24.8  | 12.4 | 6.2  | 3.1  | 1.6 | 0.8 | 0.4  |
| 10               | 40.5                            | 20.2  | 10.1 | 5.1  | 2.5  | 1.3 | 0.6 | 0.3  |
| 11               | 72.5                            | 36.2  | 18.1 | 9.1  | 4.5  | 2.3 | 1.1 | 0.6  |
| 12               | 53.6                            | 26.8  | 13.4 | 6.7  | 3.3  | 1.7 | 0.8 | 0.4  |
| 13               | 128.5                           | 64.3  | 32.1 | 16.1 | 8.0  | 4.0 | 2.0 | 1.0  |
| 14               | 90.4                            | 45.2  | 22.6 | 11.3 | 5.7  | 2.8 | 1.4 | 0.7  |
| 15               | 35.3                            | 17.7  | 8.8  | 4.4  | 2.2  | 1.1 | 0.6 | 0.3  |
